# Supplementary material for: Pathway and network-based analysis of genome-wide association studies in multiple sclerosis
Source: PubMed Central journal article supplement — Hum Mol Genet. 2009 Mar 13;18(11):2078–90. doi: 10.1093/hmg/ddp120 (PMC2678928; doi:10.1093/hmg/ddp120), 2009-03-13
Supplement: ddp120_1.pdf [file ddp120_1.pdf]

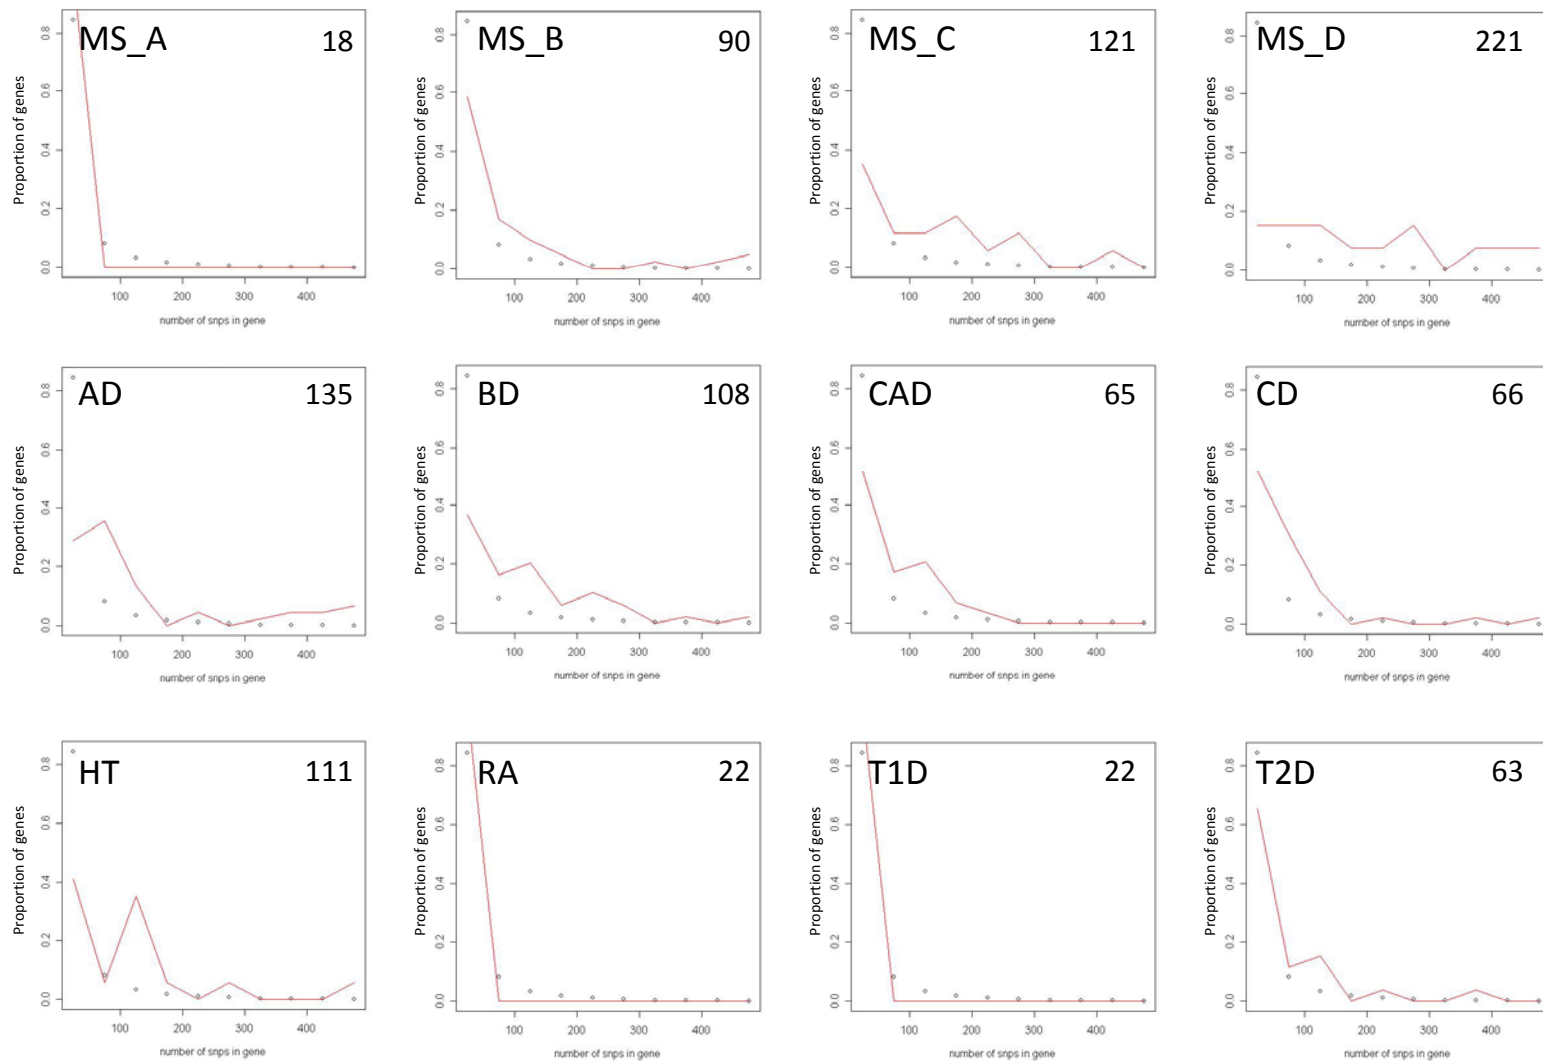

**Supplementary Figure 1.** Proportion of significant genes in a module as a function of gene size.

The red curve denotes the relationship for the modules described in the manuscript, while the black dots indicate the same relationship for a random sample of genes (background). The module for each disease is indicated in the top left corner and the average gene size (in number of SNPs) for that module is indicated in the top right corner of each panel. The average gene size for the background was 60.

### **Supplementary Table 1. Module identification in an expanded pathway dataset**

The 25 most significant pathway modules in both our own genome scan and the IMSGC genome scan. These broadly identified the same core modules as our PINBPA approach, including immune and neural modules. Putative MS disease mechanisms are represented by a different color.

| Rank | GeneMSA |            |         |             | IMSGC   |         | PathwayID | Pathway Source: Pathway Name                                       | GeneMSA Genotypic P value gene summary |          |           | GeneMSA Trend P value gene summary |          |           | IMSGC P value gene summary |          |           |
|------|---------|------------|---------|-------------|---------|---------|-----------|--------------------------------------------------------------------|----------------------------------------|----------|-----------|------------------------------------|----------|-----------|----------------------------|----------|-----------|
|      | Geno_P  | Geno_P_FDR | Trend_P | Trend_P_FDR | P-value | P_FDR   |           |                                                                    | Pathway_genes                          | No_genes | Sig_genes | Pathway_genes                      | No_genes | Sig_genes | Pathway_genes              | No_genes | Sig_genes |
| 1    | 2.2E-03 | 3.2E-01    | 3.3E-03 | 3.3E-01     | 1.1E-10 | 4.2E-07 | 411       | GO:Antigen Presentation: BP                                        | 25                                     | 18       | 9         | 25                                 | 18       | 11        | 25                         | 20       | 11        |
| 2    | 1.4E-03 | 3.2E-01    | 9.6E-04 | 2.5E-01     | 3.5E-08 | 6.8E-05 | 408       | GO:Antigen Presentation, Exogenous Antigen: BP                     | 16                                     | 9        | 6         | 16                                 | 9        | 8         | 16                         | 13       | 6         |
| 3    | 1.8E-05 | 2.3E-02    | 1.8E-05 | 2.2E-02     | 7.1E-08 | 9.1E-05 | 3572      | NetPro:Morphogenesis:Neurogenesis                                  | 89                                     | 53       | 29        | 89                                 | 53       | 37        | 89                         | 75       | 46        |
| 4    | 9.8E-04 | 3.2E-01    | 8.8E-04 | 2.5E-01     | 2.5E-07 | 2.4E-04 | 407       | GO:Antigen Presentation, Exogenous Antigen Via MHC Class II: BP    | 11                                     | 7        | 6         | 11                                 | 7        | 7         | 11                         | 9        | 6         |
| 5    | 1.8E-01 | 5.8E-01    | 1.3E-01 | 5.7E-01     | 5.3E-07 | 4.0E-04 | 413       | GO:Antigen Processing: BP                                          | 17                                     | 14       | 6         | 17                                 | 14       | 8         | 17                         | 12       | 8         |
| 6    | 7.9E-05 | 7.6E-02    | 9.1E-05 | 7.0E-02     | 1.9E-06 | 1.2E-03 | 438       | GO:Axon Guidance: BP                                               | 76                                     | 48       | 28        | 76                                 | 48       | 29        | 76                         | 62       | 42        |
| 7    | 1.1E-01 | 5.7E-01    | 4.4E-02 | 5.2E-01     | 2.6E-06 | 1.4E-03 | 613       | GO:Detection Of Biotic Stimulus: BP                                | 22                                     | 14       | 5         | 22                                 | 14       | 7         | 22                         | 18       | 9         |
| 8    | 2.8E-03 | 3.2E-01    | 1.9E-03 | 3.0E-01     | 3.8E-06 | 1.8E-03 | 410       | GO:Antigen Presentation, Peptide Antigen: BP                       | 8                                      | 6        | 5         | 8                                  | 6        | 5         | 8                          | 7        | 6         |
| 9    | 3.3E-02 | 5.4E-01    | 2.1E-02 | 4.7E-01     | 1.8E-05 | 7.2E-03 | 619       | GO:Detection Of External Stimulus: BP                              | 53                                     | 33       | 12        | 53                                 | 33       | 16        | 53                         | 42       | 20        |
| 10   | 1.5E-02 | 4.6E-01    | 1.3E-02 | 4.4E-01     | 1.9E-05 | 7.2E-03 | 622       | GO:Detection Of Pest, Pathogen Or Parasite: BP                     | 9                                      | 7        | 4         | 9                                  | 7        | 5         | 9                          | 7        | 5         |
| 11   | 1.7E-01 | 5.7E-01    | 1.3E-01 | 5.7E-01     | 2.3E-05 | 8.1E-03 | 508       | GO:Cell Recognition: BP                                            | 21                                     | 17       | 6         | 21                                 | 17       | 8         | 21                         | 16       | 11        |
| 12   | 9.1E-02 | 5.7E-01    | 3.2E-02 | 5.0E-01     | 4.3E-05 | 1.4E-02 | 624       | GO:Detection Of Stimulus: BP                                       | 80                                     | 46       | 15        | 80                                 | 46       | 22        | 80                         | 64       | 33        |
| 13   | 1.3E-03 | 3.2E-01    | 2.3E-04 | 1.5E-01     | 5.3E-05 | 1.6E-02 | 2925      | Jubilant:Responsive Genes--Pain                                    | 74                                     | 47       | 24        | 74                                 | 47       | 30        | 74                         | 68       | 44        |
| 14   | 1.1E-01 | 5.7E-01    | 2.7E-02 | 4.8E-01     | 8.3E-05 | 2.1E-02 | 1506      | GO:Regulation Of T Cell Differentiation: BP                        | 25                                     | 15       | 5         | 25                                 | 15       | 9         | 25                         | 24       | 9         |
| 15   | 3.0E-04 | 1.6E-01    | 3.6E-04 | 1.7E-01     | 8.9E-05 | 2.1E-02 | 501       | GO:Cell Fate Determination: BP                                     | 26                                     | 17       | 10        | 26                                 | 17       | 10        | 26                         | 19       | 14        |
| 16   | 1.7E-06 | 6.7E-03    | 6.8E-07 | 2.6E-03     | 8.9E-05 | 2.1E-02 | 500       | GO:Cell Fate Commitment: BP                                        | 86                                     | 54       | 30        | 86                                 | 54       | 34        | 86                         | 70       | 41        |
| 17   | 1.3E-05 | 2.3E-02    | 2.2E-06 | 4.2E-03     | 1.0E-04 | 2.3E-02 | 1226      | GO:Positive Regulation Of Development: BP                          | 81                                     | 48       | 30        | 81                                 | 48       | 36        | 81                         | 72       | 38        |
| 18   | 2.8E-01 | 6.3E-01    | 1.5E-01 | 5.8E-01     | 1.2E-04 | 2.5E-02 | 399       | GO:Angiogenesis: BP                                                | 99                                     | 66       | 23        | 99                                 | 66       | 34        | 99                         | 87       | 48        |
| 19   | 1.0E-01 | 5.7E-01    | 1.2E-01 | 5.7E-01     | 1.4E-04 | 2.8E-02 | 663       | GO:Embryonic Pattern Specification: BP                             | 35                                     | 20       | 10        | 35                                 | 20       | 13        | 35                         | 28       | 18        |
| 20   | 1.9E-03 | 3.2E-01    | 3.0E-03 | 3.3E-01     | 1.8E-04 | 3.4E-02 | 3542      | NetPro:Lymphocyte activation:Natural killer cell activation        | 50                                     | 27       | 15        | 50                                 | 27       | 16        | 50                         | 44       | 18        |
| 21   | 5.0E-02 | 5.4E-01    | 3.8E-02 | 5.2E-01     | 1.9E-04 | 3.5E-02 | 1660      | GO:T Cell Differentiation: BP                                      | 44                                     | 28       | 11        | 44                                 | 28       | 16        | 44                         | 42       | 15        |
| 22   | 3.7E-02 | 5.4E-01    | 1.9E-01 | 5.9E-01     | 2.2E-04 | 3.8E-02 | 3835      | Glutamate receptors                                                | 61                                     | 43       | 17        | 61                                 | 43       | 19        | 61                         | 51       | 31        |
| 23   | 1.9E-01 | 5.8E-01    | 2.0E-01 | 5.9E-01     | 2.8E-04 | 4.7E-02 | 412       | GO:Antigen Processing, Exogenous Antigen Via MHC Class II: BP      | 6                                      | 4        | 2         | 6                                  | 4        | 3         | 6                          | 5        | 4         |
| 24   | 3.2E-01 | 6.6E-01    | 1.2E-01 | 5.7E-01     | 3.2E-04 | 4.8E-02 | 3767      | NetPro:Transmembrane receptor activity:Glutamate receptor activity | 38                                     | 21       | 9         | 38                                 | 21       | 11        | 38                         | 34       | 24        |
| 25   | 1.9E-04 | 1.2E-01    | 4.9E-05 | 4.7E-02     | 3.2E-04 | 4.8E-02 | 1214      | GO:Positive Regulation Of Cell Differentiation: BP                 | 59                                     | 34       | 21        | 59                                 | 34       | 25        | 59                         | 52       | 27        |

Disease Hypothesis:  
Green: Neurogenesis  
Red: Known MS pathways  
Orange: Immune hypothesis  
Blue: Cell fate and differentiation
